# Supplementary material for: Association between Comorbidities and Progression of Transvalvular Pressure Gradients in Patients with Moderate and Severe Aortic Valve Stenosis
Source: Hindawi journal article supplement (doi:10.1155/2018/3713897), 2018-11-11
Supplement: f1 [file 3713897.f1.pdf]

**Supplementary table 1** Odds ratio of cardiac comorbidities and risk factors at baseline and follow-up associated with fast Pmean progression after adjusted for age and sex

|                            | OR adjusted for<br>age<br>(95% CI) | P value      | OR adjusted for<br>sex<br>(95% CI) | P value      | OR adjusted for<br>age and sex<br>(95% CI) | P value      |
|----------------------------|------------------------------------|--------------|------------------------------------|--------------|--------------------------------------------|--------------|
| Baseline                   | 1.260                              | 0.383        | 1.196                              | 0.495        | 1.260                                      | 0.385        |
| BMI≥30 Kg/m <sup>2</sup>   | (0.749-2.121)                      |              | (0.716-1.997)                      |              | (0.749-2.120)                              |              |
| Follow-up                  | 0.928                              | 0.740        | 0.918                              | 0.918        | 0.925                                      | 0.726        |
| BMI≥30 Kg/m <sup>2</sup>   | (0.599-1.439)                      |              | (0.592-1.423)                      |              | (0.596-1.434)                              |              |
| Baseline                   | 0.975                              | 0.908        | 0.955                              | 0.849        | 0.965                                      | 0.883        |
| history of smoking         | (0.633-1.502)                      |              | (0.593-1.538)                      |              | (0.598-1.557)                              |              |
| Follow-up                  | 0.958                              | 0.845        | 0.936                              | 0.785        | 0.945                                      | 0.820        |
| history of smoking         | (0.622-1.475)                      |              | (0.584-1.501)                      |              | (0.589-1.028)                              |              |
| Baseline                   | 0.707                              | 0.119        | 0.706                              | 0.119        | 0.706                                      | 0.119        |
| diabetes                   | (0.457-1.094)                      |              | (0.456-1.094)                      |              | (0.456-1.093)                              |              |
| Follow-up                  | 0.626                              | <b>0.032</b> | 0.626                              | <b>0.032</b> | 0.626                                      | <b>0.032</b> |
| diabetes                   | (0.407-0.961)                      |              | (0.407-0.961)                      |              | (0.407-0.961)                              |              |
| Baseline                   | 0.512                              | <b>0.002</b> | 0.502                              | <b>0.002</b> | 0.487                                      | <b>0.002</b> |
| coronary heart disease     | (0.333-0.786)                      |              | (0.324-0.779)                      |              | (0.312-0.760)                              |              |
| Follow-up                  | 0.611                              | <b>0.021</b> | 0.0606                             | <b>0.022</b> | 0.587                                      | <b>0.016</b> |
| coronary heart disease     | (0.403-0.928)                      |              | (0.395-0.931)                      |              | (0.379-0.907)                              |              |
| Baseline                   | 0.505                              | <b>0.014</b> | 0.506                              | <b>0.015</b> | 0.494                                      | <b>0.012</b> |
| myocardial infarction      | (0.294-0.869)                      |              | (0.293-0.874)                      |              | (0.285-0.856)                              |              |
| Follow-up                  | 0.430                              | <b>0.002</b> | 0.430                              | <b>0.002</b> | 0.416                                      | <b>0.001</b> |
| myocardial infarction      | (0.255-0.724)                      |              | (0.254-0.727)                      |              | (0.245-0.707)                              |              |
| Baseline                   | 0.807                              | 0.491        | 0.835                              | 0.556        | 0.806                                      | 0.490        |
| hypertension               | (0.437-1.487)                      |              | (0.458-1.522)                      |              | (0.437-1.487)                              |              |
| Follow-up                  | 1.088 (0.504-                      | 0.829        | 1.129                              | 0.750        | 1.088                                      | 0.830        |
| hypertension               | 2.351)                             |              | (0.533-2.388)                      |              | (0.504-2.351)                              |              |
| Baseline                   | 0.661                              | 0.054        | 0.680                              | 0.071        | 0.655                                      | 0.051        |
| renal dysfunction          | (0.433-1.008)                      |              | (0.448-1.033)                      |              | (0.428-1.002)                              |              |
| Follow-up                  | 0.749                              | 0.212        | 0.779                              | 0.268        | 0.747                                      | 0.210        |
| renal dysfunction          | (0.475-1.180)                      |              | (0.5-1.212)                        |              | (0.473-1.179)                              |              |
| Baseline peripheral artery | 0.614                              | 0.063        | 0.617                              | 0.067        | 0.609                                      | 0.061        |
| occlusive disease          | (0.367-1.027)                      |              | (0.368-1.034)                      |              | (0.363-1.022)                              |              |
| Follow-up peripheral       | 0.945                              | 0.795        | 0.948                              | 0.810        | 0.941                                      | 0.786        |
| artery occlusive disease   | (0.614-1.454)                      |              | (0.611-1.469)                      |              | (0.606-1.46)                               |              |
| Baseline                   | 1.453                              | 0.194        | 1.458                              | 0.190        | 1.453                                      | 0.193        |
| cerebrovascular disease    | (0.827-2.552)                      |              | (0.830-2.560)                      |              | (0.827-2.553)                              |              |
| Follow-up                  | 1.647                              | 0.051        | 1.652                              | <b>0.050</b> | 1.647                                      | 0.051        |
| cerebrovascular disease    | (0.997-2.719)                      |              | (1.000-2.727)                      |              | (0.998-2.721)                              |              |

Pmean, mean trans-aortic pressure gradient; OR, odds ratio; CI, confidence interval; BMI, body mass index

**Supplementary table 2** Odds ratio of laboratory parameters associated with fast Pmean progression after adjusted for age and sex

|                            | OR adjusted for<br>age<br><br>(95% CI) | P value      | OR adjusted for<br>sex<br><br>(95% CI) | P value      | OR adjusted for<br>age and sex<br><br>(95% CI) | P value      |
|----------------------------|----------------------------------------|--------------|----------------------------------------|--------------|------------------------------------------------|--------------|
| Number of<br>comorbidities | 0.866<br>(0.759-0.989)                 | <b>0.034</b> | 0.858<br>(0.747-0.985)                 | <b>0.029</b> | 0.852<br>(0.741-0.980)                         | <b>0.025</b> |
| LDL- Cholesterol           | 1.010<br>(1.003-1.016)                 | <b>0.004</b> | 1.009<br>(1.003-1.016)                 | <b>0.007</b> | 1.010<br>(1.003-1.016)                         | <b>0.005</b> |
| HDL-Cholesterol            | 1.015<br>(1.002-1.028)                 | <b>0.027</b> | 1.015<br>(1.001-1.028)                 | <b>0.034</b> | 1.015<br>(1.001-1.028)                         | <b>0.035</b> |
| HbA1c                      | 0.946<br>(0.756-1.183)                 | 0.624        | 0.946<br>(0.756-1.183)                 | 0.626        | 0.941<br>(0.751-1.178)                         | 0.594        |
| Hemoglobin                 | 1.028<br>(0.972-1.087)                 | 0.335        | 1.027<br>(0.971-1.086)                 | 0.346        | 1.028<br>(0.972-1.088)                         | 0.332        |
| C-reactive protein         | 0.897<br>(0.804-1.001)                 | 0.052        | 0.896<br>(0.803-1)                     | <b>0.050</b> | 0.897<br>(0.804-1.001)                         | 0.053        |
| Creatinine                 | 0.971<br>(0.808-1.166)                 | 0.750        | 0.967<br>(0.803-1.164)                 | 0.719        | 0.970<br>(0.805-1.169)                         | 0.752        |

Pmean, mean trans-aortic pressure gradient; OR, odds ratio; CI, confidence interval; LDL, low-density lipoprotein; HDL, high-density lipoprotein; HbA1c, hemoglobin A1c
